# Supplementary material for: Limited oxygen in standard cell culture alters metabolism and function of differentiated cells
Source: PubMed Central journal article supplement (PMC11148168; doi:10.1038/s44318-024-00084-7), 2024-04-05
Supplement: 44318_2024_84_MOESM13_ESM.pdf [file 44318_2024_84_MOESM13_ESM.pdf]

## Expanded View Figures

**Figure EV1. Changes in glucose metabolism in low medium is due to increased oxygen availability.**

(A) Table of medium volumes used in this study and the corresponding medium heights of both top and bottom menisci. Images of each plate-type containing different medium volumes were used to measure menisci heights. Known well diameters were used to convert menisci heights from pixels to mm. 'High' refers to the standard culture volumes used. (B) Representative trace of fluorescence intensity indicative of pericellular oxygen concentrations under different medium volumes, measured for 24 h in 96-well plates. The bar graph shows relative oxygen levels taken at 16 h (arrow in representative trace) ( $n = 4$  biological replicates). AA antimycin A. (C) Western blot of mitochondrial respiratory complexes I-V after 16 h of medium volume change in 12-well plates ( $n = 3$  biological replicates). (D) Oxygen consumption rate (OCR) of permeabilised 3T3-L1 adipocytes upon different substrate stimulation after 16 h of medium volume change ( $n = 5$  biological replicates). (E) Extracellular medium glucose and lactate measurements in 24-well or Lumox plates after 16 h culture in high or low medium volumes ( $n = 3$  biological replicates). (F) Medium glucose concentration after 16 h of medium volume change in 12-well plates ( $n = 6$  biological replicates). (G) Extracellular medium glucose and lactate measurements after 16 h medium volume change with different starting glucose concentrations in 12-well plates. ( $n = 4$  biological replicates). (H) OCR measurements from different cell densities in 96-well plates ( $n = 3$  biological replicates). (I) Extracellular medium glucose and lactate measurements after 16 h medium volume change with different cell densities in 12-well plates measured by DNA concentration. ( $n = 3$  biological replicates). Data information: Data were represented as mean  $\pm$  SEM (B, D-I). \*\*\*\* $p < 0.0001$  by two-way ANOVA with Šidák correction for multiple comparisons (E).

**A**

| Plate                        | 12-well            |               |                  | 24-well            |               |                  | 96-well            |               |                  |
|------------------------------|--------------------|---------------|------------------|--------------------|---------------|------------------|--------------------|---------------|------------------|
| Well area (cm <sup>2</sup> ) | 3.8                |               |                  | 1.9                |               |                  | 0.32               |               |                  |
|                              | Medium volume (μL) | Top men. (mm) | Bottom men. (mm) | Medium volume (μL) | Top men. (mm) | Bottom men. (mm) | Medium volume (μL) | Top men. (mm) | Bottom men. (mm) |
| High (standard)              | 1000               | 4.7           | 2.4              | 500                | 3.9           | 2.2              | 100                | 3.3           | 2.5              |
| Mid                          | 666                | 3.8           | 1.7              | 333                | 3.5           | 1.6              | 50                 | 2.2           | 1.5              |
| Low                          | 333                | 3.0           | 0.8              | 167                | 1.9           | 0.8              | 33                 | 2.0           | 0.7              |

**B**

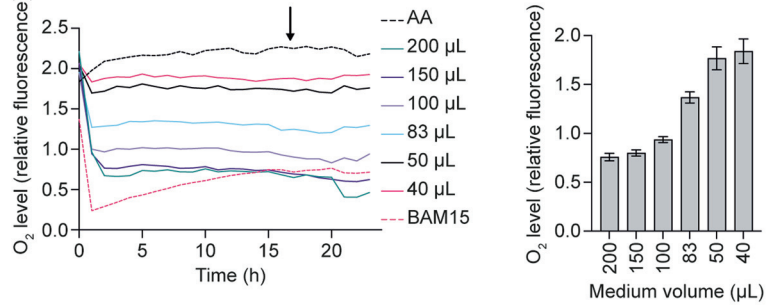

**C**

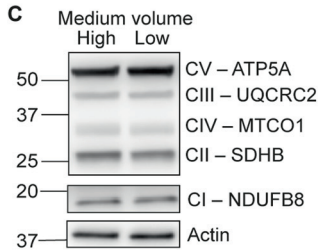

**D**

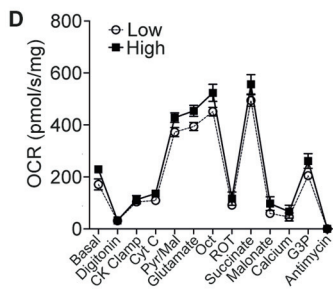

**E**

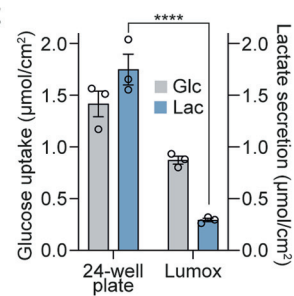

**F**

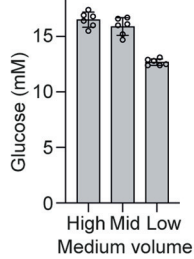

**G**

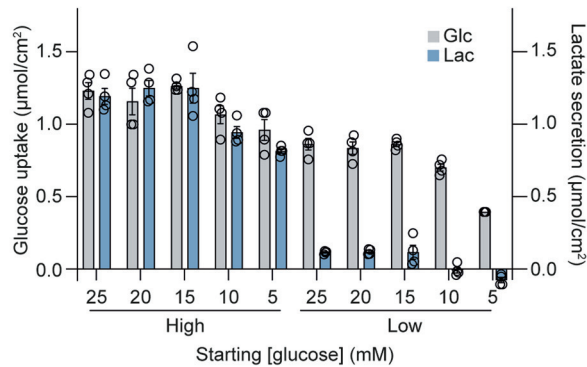

**H**

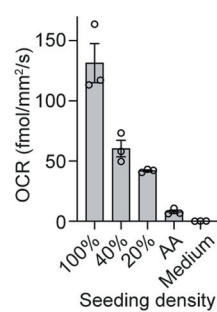

**I**

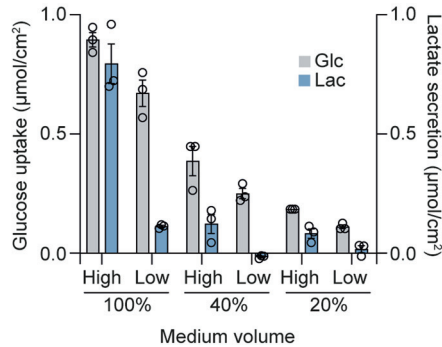

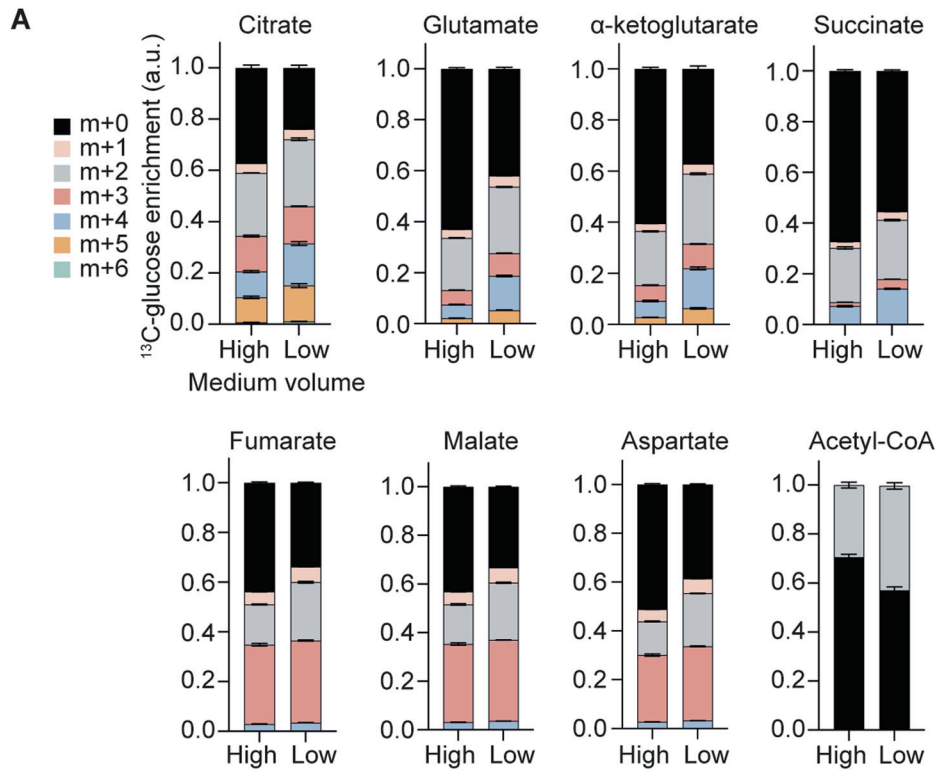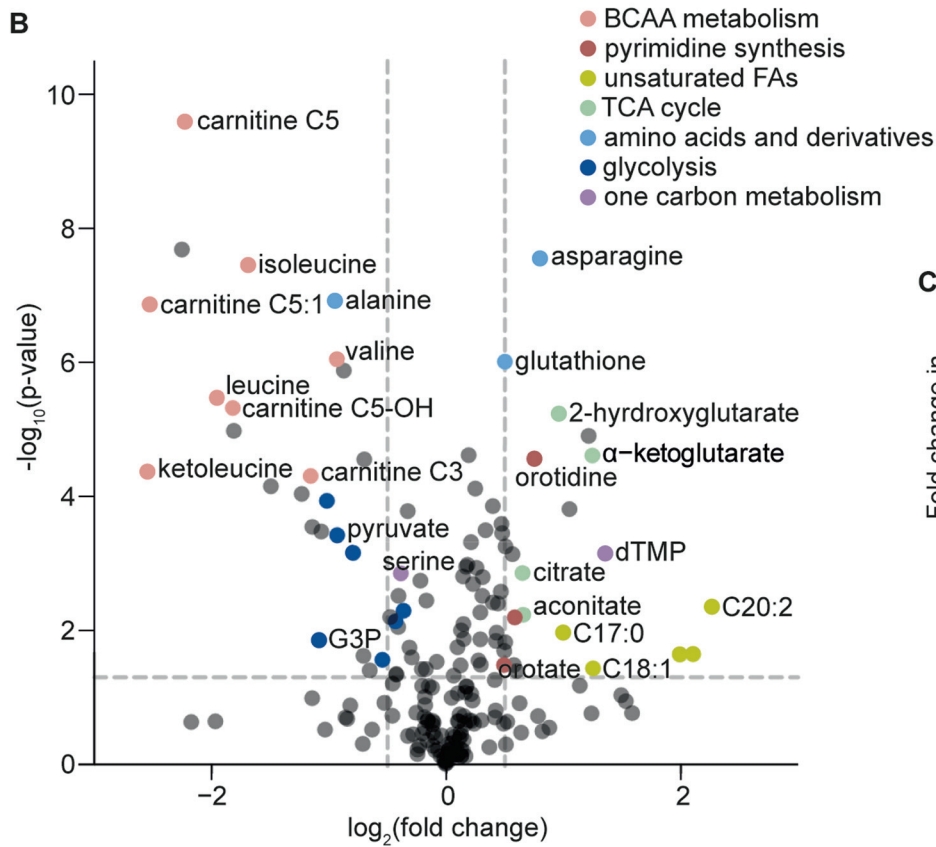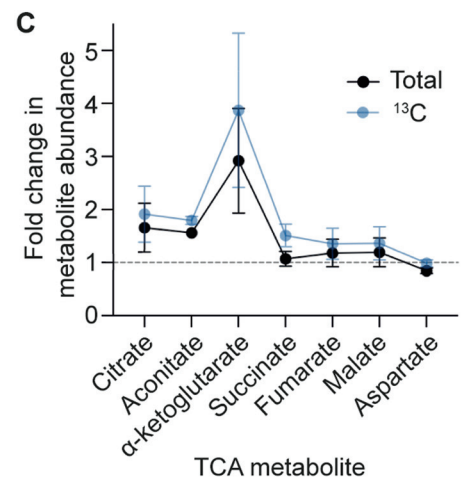

**◀ Figure EV2. Lowering medium volumes rewires cellular metabolism.**

(A) Fractional abundance of each isotopologue after 4 h medium volume change ( $n = 6$  biological replicates). (B) Volcano plot of differentially regulated metabolites after 16 h medium volume change. Metabolites of interest which are significantly changed ( $p < 0.05$ ) are highlighted according to their metabolic pathways ( $n = 6$  biological replicates). BCAA branched-chain amino acid, FA fatty acid, G3P glyceraldehyde-3-phosphate. (C) Fold change of total and  $U^{13}C$ -glucose labelled TCA metabolite abundance after 16 h medium volume change in 12-well plates ( $n = 4$  biological replicates). Data information: Data were represented as mean  $\pm$  SEM (A, C).  $p$  value threshold of 0.05 (B) was determined using differential metabolite analysis (DMA) with Student's  $t$ -test.

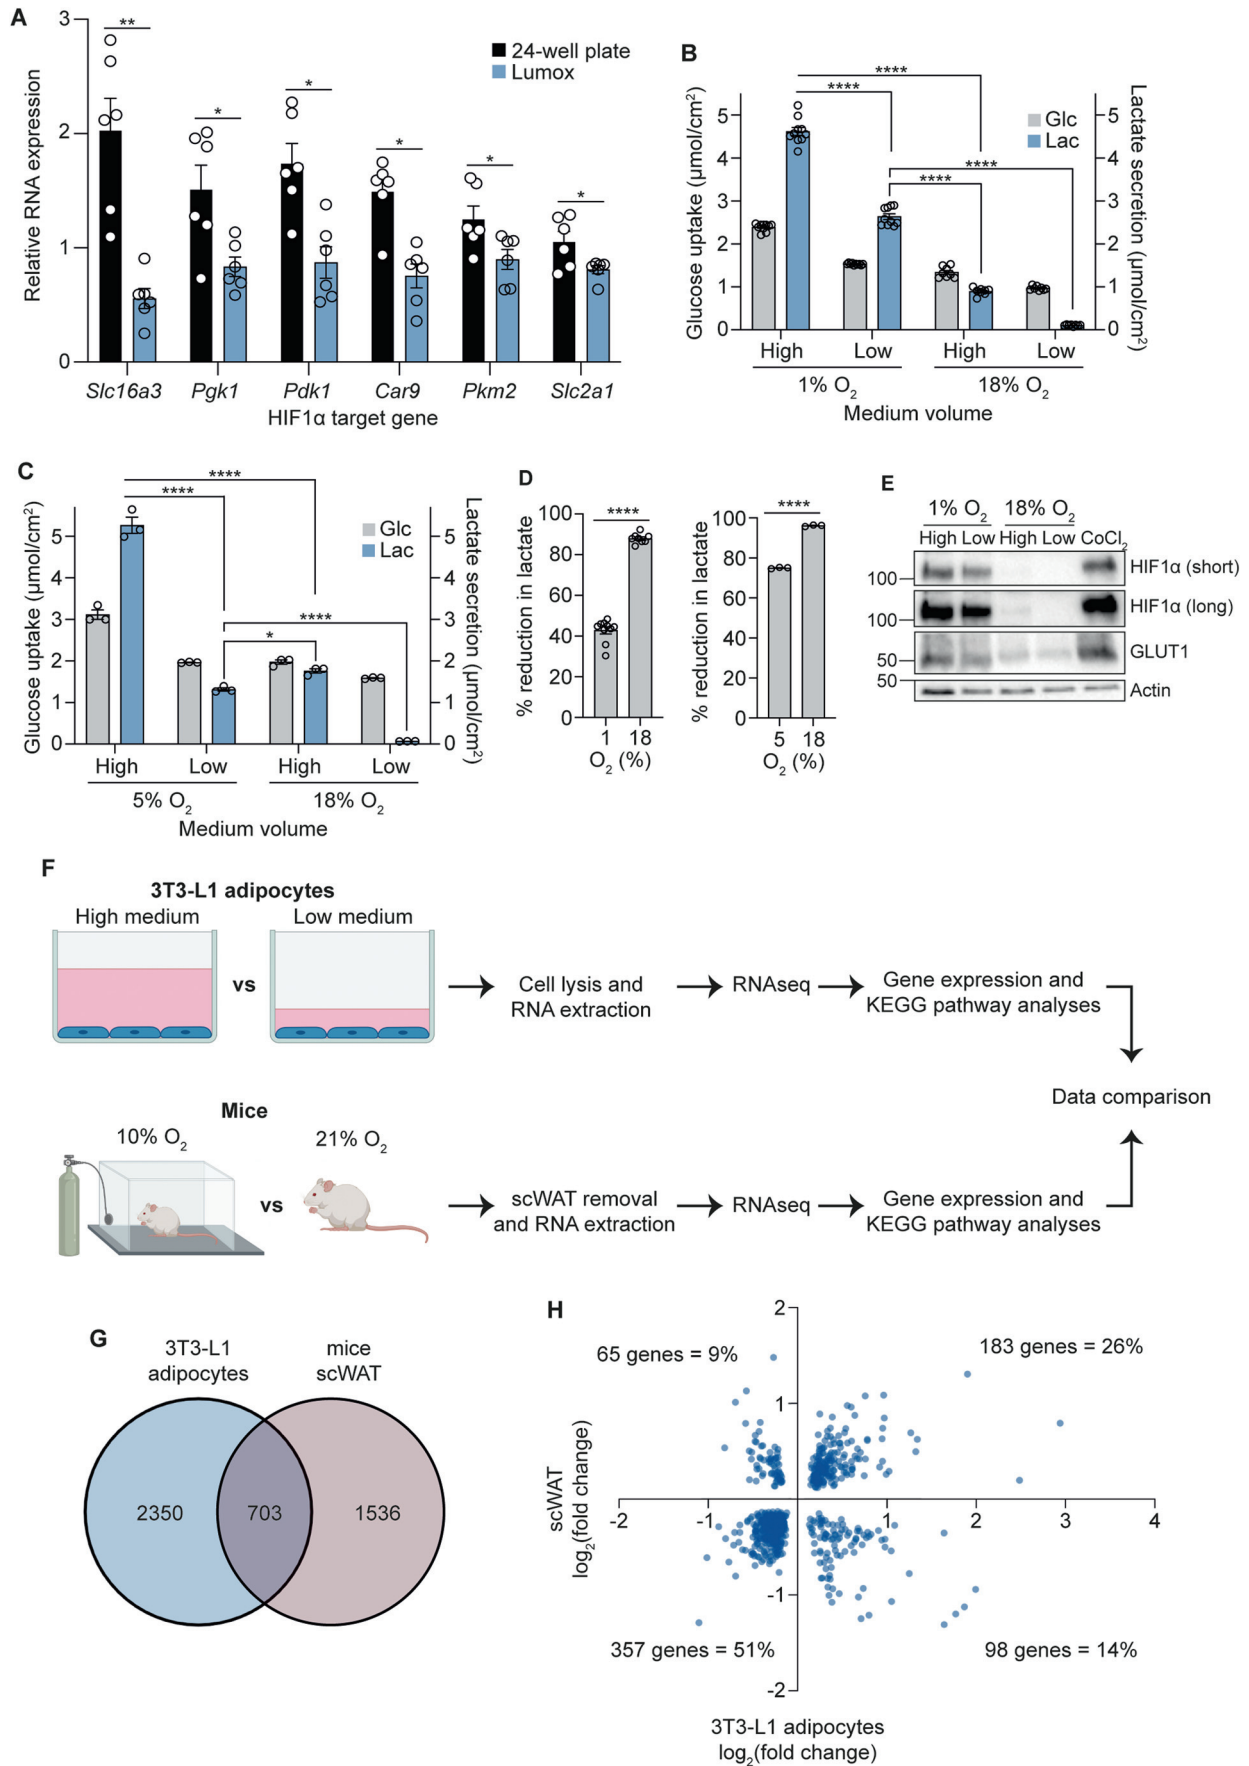

◀ **Figure EV3. Reducing oxygen availability causes metabolic and transcriptional rewiring.**

(A) Relative RNA expression of HIF1 $\alpha$  target genes in 3T3-L1 adipocytes cultured in either 24-well or gas-permeable Lumox plates ( $n = 6$  biological replicates). (B) Extracellular medium glucose and lactate measurements after 16 h medium volume change (12-well plate) in 1 or 18% oxygen incubators ( $n = 8-10$  biological replicates). (C) Extracellular medium glucose and lactate measurements after 16 h medium volume change (12-well plate) in 5 or 18% oxygen incubators ( $n = 3$  biological replicates). (D) Percentage reduction in lactate production calculated from Fig. EV3B (1% O<sub>2</sub>) ( $n = 8-10$  biological replicates) and EV3C (5% O<sub>2</sub>) ( $n = 3$  biological replicates). (E) Western blot of HIF1 $\alpha$  (after both short and long imaging exposures) and GLUT1 after 16 h medium volume change at 1 or 18% O<sub>2</sub> in 12-well plates ( $n = 3$  biological replicates). (F) Schematic representation of the RNAseq experimental workflow. RNA extracted from 3T3-L1 adipocytes (cultured in high or low medium for 16 h in 12-well plates) or scWAT (obtained from mice kept in 10 or 21% O<sub>2</sub> for 4 weeks) were sequenced. The two sets of analysed data were then compared. (G) Venn diagram showing the overlapping differentially expressed genes ( $p\text{-adj} < 0.05$ ) from both 3T3-L1 adipocytes (high vs low medium) ( $n = 6$  biological replicates) and mice scWAT (10 vs 21% O<sub>2</sub>) ( $n = 10$  biological replicates). (H) Fold change of the 703 differentially expressed genes in 3T3-L1 adipocytes (y-axis) and mice scWAT (x-axis) from the intersection in Fig. EV3D, showing a 77% directional concordance. Data information: Data were represented as mean  $\pm$  SEM (A–D). \* $p < 0.05$ , \*\* $p < 0.01$ , \*\*\*\* $p < 0.0001$  by two-way ANOVA with Šidák correction for multiple comparisons (B, C), or by paired/unpaired Student's  $t$ -tests (A, D).

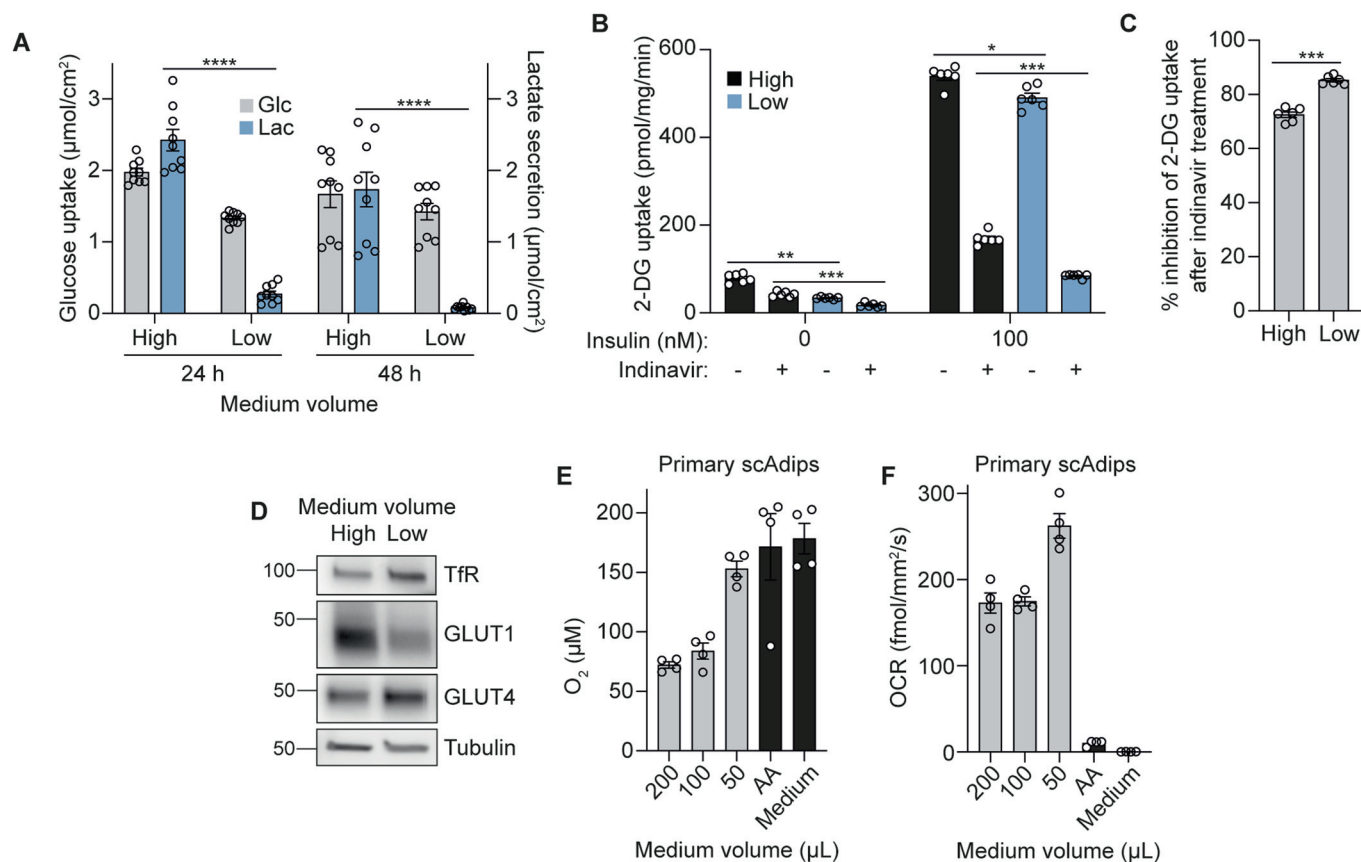

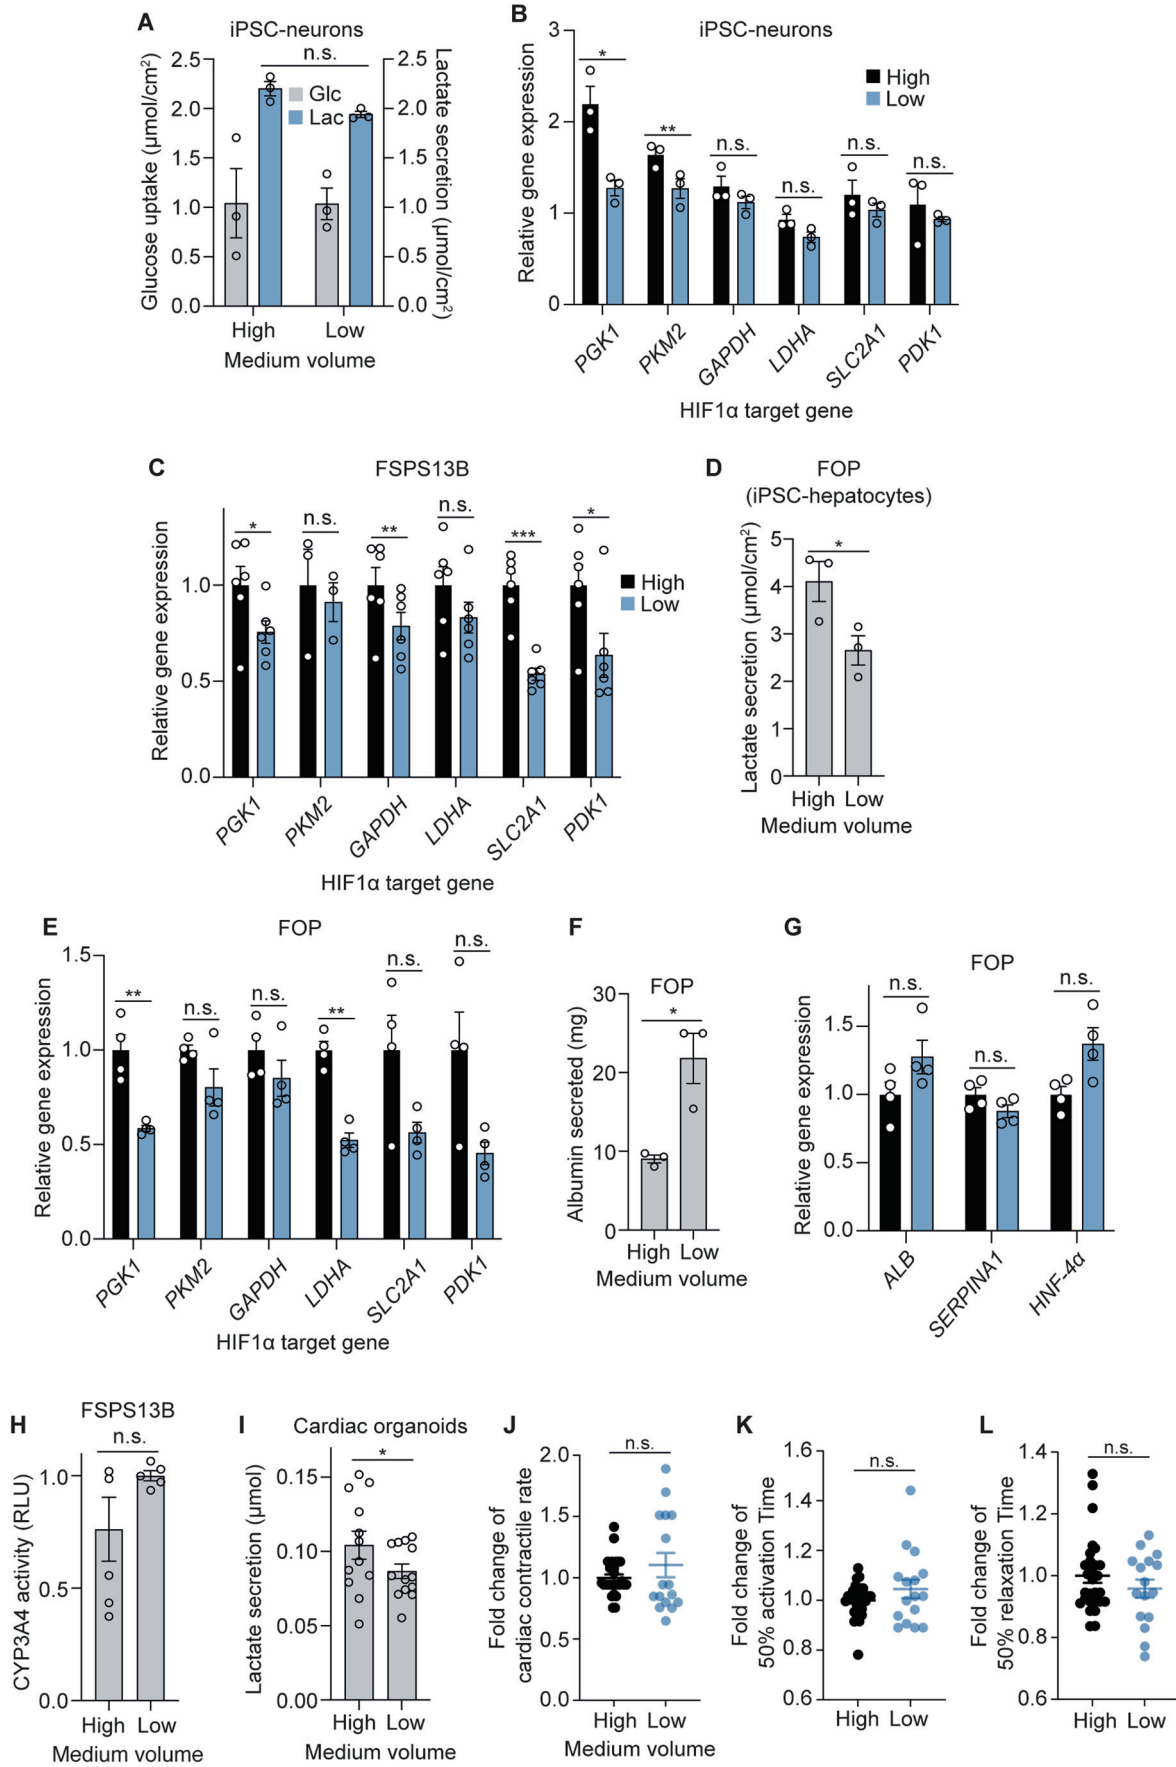



**◀ Figure EV5. Effects of low medium volumes on other primary and hPSC-derived cell types.**

(A) Extracellular medium glucose and lactate measurements from iPSC-derived neurones after 16 h medium volume change in 6-well plates ( $n = 3$  biological replicates). (B) Relative RNA expression of HIF1 $\alpha$  target genes in iPSC-derived neurones after 16 h medium volume change in 12-well plates ( $n = 3$  biological replicates). (C) Relative RNA expression of HIF1 $\alpha$  target genes in FSPS13B hepatocytes cultured under different medium volumes in 12-well plates throughout differentiation ( $n = 3-6$  biological replicates). (D) Lactate secretion in FOP hepatocytes after medium volume change in 12-well plates throughout differentiation ( $n = 3$  biological replicates). (E) Relative RNA expression of HIF1 $\alpha$  target genes in FOP hepatocytes cultured under different medium volumes in 12-well plates throughout differentiation ( $n = 4$  biological replicates). (F) Albumin secretion over 24 h by FOP hepatocytes after medium volume change in 12-well plates throughout differentiation ( $n = 3$  biological replicates). (G) Relative RNA expression of hepatocyte differentiation marker genes in FOP hepatocytes after medium volume change in 12-well plates throughout differentiation ( $n = 4$  biological replicates). (H) Relative CYP3A4 activity in FSPS13B hepatocytes after medium volume change throughout differentiation ( $n = 5$  biological replicates). (I) Lactate secretion by cardiac organoids after 48 h of medium volume change ( $n = 3-6$  technical replicates from  $n = 3$  biological replicates). High = 150  $\mu$ L, Low = 50  $\mu$ L. (J) Contractile rate (normalised) ( $n = 2-17$  technical replicates from  $n = 4$  biological replicates). (K) Time from 50% activation to peak (normalised) ( $n = 2-17$  technical replicates from  $n = 4$  biological replicates). (L) Time from peak to 50% relaxation (normalised) ( $n = 2-17$  technical replicates from  $n = 4$  biological replicates). Data information: All data were represented as mean  $\pm$  SEM (A-L). n.s. non-significant; \* $p < 0.05$ , \*\* $p < 0.01$ , \*\*\* $p < 0.001$  by two-way ANOVA (A) or by paired/unpaired two-tailed Student's  $t$ -test (B-L).
